# Supplementary material
Source: publisher site journal article supplement (https://www.dovepress.com/get_supplementary_file.php?f=174408.docx)
Supplement: Supplementary file 1 [file get_supplementary_file.php]

**Supplemental Appendix**

**Table S1** Database search strategy

| Ovid |  |
| --- | --- |
| 1 | exp Arthritis, Juvenile/ |
| 2 | ((juvenile or childhood or juvenile-onset or childhood-onset) adj5 (arthriti* or arthrosis or Polyarthriti* or Oligoarthriti* or still's disease or stills disease or still disease or Rheumat* or JIA or JRA)).mp. |
| 3 | 1 or 2 |
| 4 | exp Depression/ or exp Depressive Disorder, Major/ |
| 5 | exp Anxiety Disorders/ or exp Anxiety/ |
| 6 | (depression or depressive or depressed or anxiet* or anxious*).mp |
| 7 | 4 or 5 or 6 |
| 8 | 3 and 7 |
| 9 | remove duplicates from 8 |
| Ovid take 2 | |
| 1 | exp Arthritis, Juvenile/ |
| 2 | ((juvenile or childhood or juvenile-onset or childhood-onset or child or children) adj5 (arthriti* or arthrosis or Polyarthriti* or Oligoarthriti* or still's disease or stills disease or still disease or Rheumat* or JIA or JRA or enthesitis-related or enthesitis related or systemic or ankylosing spondylitis)).mp. |
| 3 | 1 or 2 |
| 4 | exp Depression/ or exp Depressive Disorder, Major/ |
| 5 | exp Anxiety Disorders/ or exp Anxiety/ |
| 6 | (depression or depressive or depressed or anxiet* or anxious* or dysthymi*).mp. |
| 7 | 4 or 5 or 6 |
| 8 | 3 and 7 |
| Scopus | |
| 1 | TITLE-ABS-KEY((juvenile or childhood or juvenile-onset or childhood-onset or child or children) W/5 (arthriti* or arthrosis or Polyarthriti* or Oligoarthriti* or "still's disease" or "stills disease" or "still disease" or Rheumat* or JIA or JRA or "enthesitis-related" or "enthesitis related" or "systemic arthriti*"or "ankylosing spondylitis")) |
| 2 | TITLE-ABS-KEY((depression or depressive or depressed or anxiet* or anxious* or dysthymi*)) |
| 3 | #1 AND #2 |
| Web of Science | |
| 1 | TS=((juvenile or childhood or juvenile-onset or childhood-onset or child or children) NEAR/5 (arthriti* or arthrosis or Polyarthriti* or Oligoarthriti* or "still's disease" or "stills disease" or "still disease" or Rheumat* or JIA or JRA or "enthesitis-related" or "enthesitis related" or "systemic arthriti*"or "ankylosing spondylitis")) |
| 2 | TS=((depression or depressive or depressed or anxiet* or anxious* or dysthymi*)) |
| 3 | #1 AND #2 |
| PsycINFO | |
| 1 | ((juvenile or childhood or juvenile-onset or childhood-onset or child or children) adj5 (arthriti* or arthrosis or Polyarthriti* or Oligoarthriti* or still's disease or stills disease or still disease or Rheumat* or JIA or JRA or enthesitis-related or enthesitis related or systemic or ankylosing spondylitis)).mp. |
| 2 | exp MAJOR DEPRESSION/ or exp "DEPRESSION (EMOTION)"/ |
| 3 | exp ANXIETY DISORDERS/ or exp ANXIETY/ |
| 4 | (depression or depressive or depressed or anxiet* or anxious* or dysthymi*).mp. |
| 5 | 2 or 3 or 4 |
| 6 | 1 and 5 |
|  |  |
| CINAHL | |
| 1 | (MH "Arthritis, Juvenile Rheumatoid") |
| 2 | ((juvenile OR childhood OR juvenile-onset OR childhood-onset OR child OR children) N5 (arthriti* OR arthrosis OR Polyarthriti* OR Oligoarthriti* OR "still's disease" OR "stills disease" OR "still disease" OR Rheumat* OR JIA OR JRA OR enthesitis-related OR "enthesitis related" OR systemic OR "ankylosing spondylitis")) |
| 3 | S1 OR S2 |
| 4 | (MH "Anxiety+") OR (MH "Anxiety Disorders+") |
| 5 | (MH "Depression+") |
| 6 | (depression OR depressive OR depressed OR anxiet* OR anxious* OR dysthymi*) |
| 7 | S4 OR S5 OR S6 |
| 8 | S3 AND S7 |
|  |  |
| Cochrane | |
| 1 | MeSH descriptor: [Arthritis, Juvenile] explode all trees |
| 2 | ((juvenile OR childhood OR juvenile-onset OR childhood-onset OR child OR children) NEAR/3 (arthriti* OR arthrosis OR Polyarthriti* OR Oligoarthriti* OR "still's disease" OR "stills disease" OR "still disease" OR Rheumat* OR JIA OR JRA OR "enthesitis-related" OR "enthesitis related" OR systemic OR "ankylosing spondylitis")) |
| 3 | #1 OR #2 |
| 4 | MeSH descriptor: [Depression] explode all trees |
| 5 | MeSH descriptor: [Depressive Disorder] explode all trees |
| 6 | MeSH descriptor: [Anxiety] explode all trees |
| 7 | MeSH descriptor: [Anxiety] explode all trees |
| 8 | (depression OR depressive OR depressed OR anxiet* OR anxious* OR dysthymi*) |
| 9 | #4 OR #5 OR #6 OR #7 OR #8 |
| 10 | #3 AND #9 |
